# Supplementary material for: Plasmon induced enhancement of surface optical phonon modes and magnon properties of NiO nanoparticles: Raman spectral probe
Source: Royal Society of Chemistry journal article supplement (doi:10.1039/d0cp03720f), 2020-01-01
Supplement: d0cp03720f1.pdf [file d0cp03720f1.pdf]

## Electronic Supplementary Information

### **Plasmon induced enhancement of surface phonon and magnon properties of NiO nanoparticles: Raman spectral probe**

Anoop Sunny, Karthikeyan Balasubramanian\*

Nanophotonics Laboratory, Department of Physics, National Institute of Technology,  
Tiruchirappalli-620 015, India

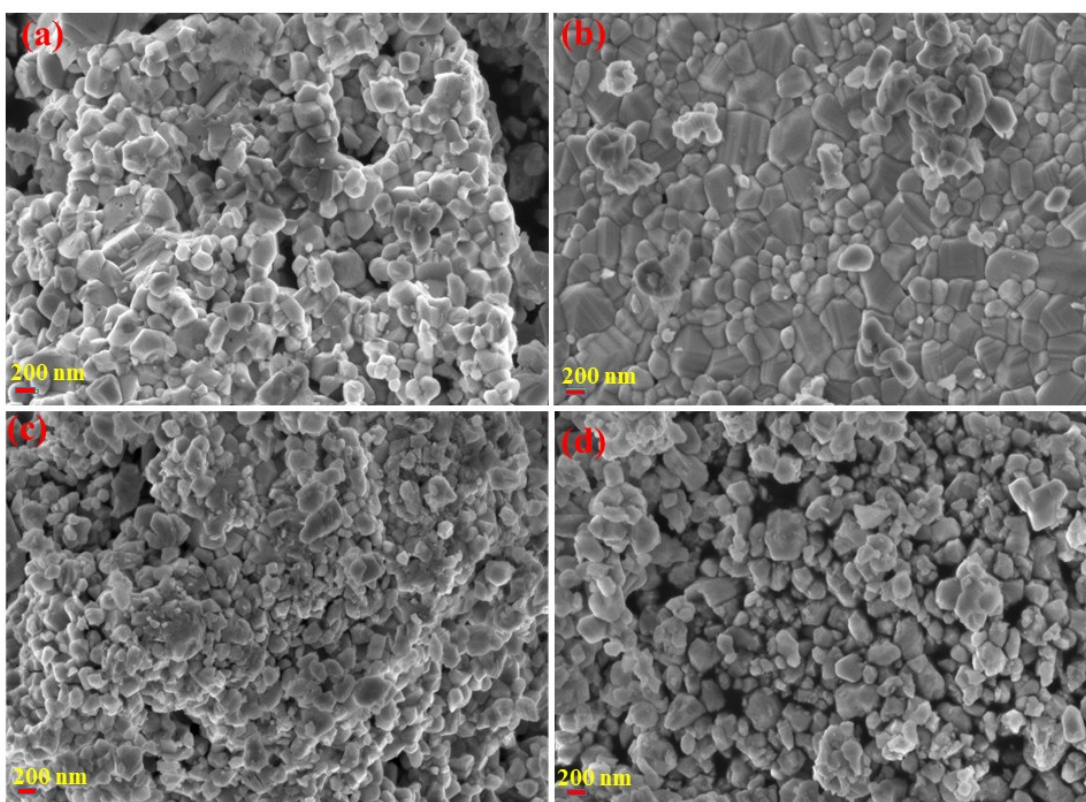

Fig S1. FE-SEM images of prepared NiO nanoparticle with different Ag doping concentrations such as (a) Pure( PNiO), (b) 1% (1AgNiO), (c) 3% (3AgNiO) and (d) 5%(5AgNiO) with a scale bar of 200 nm.

---

\* Corresponding Author. Email: bkarthik@nitt.edu (B.Karthikeyan), Phone: +91-431-2503612; FAX: Fax: +91-(0)431-2500133.

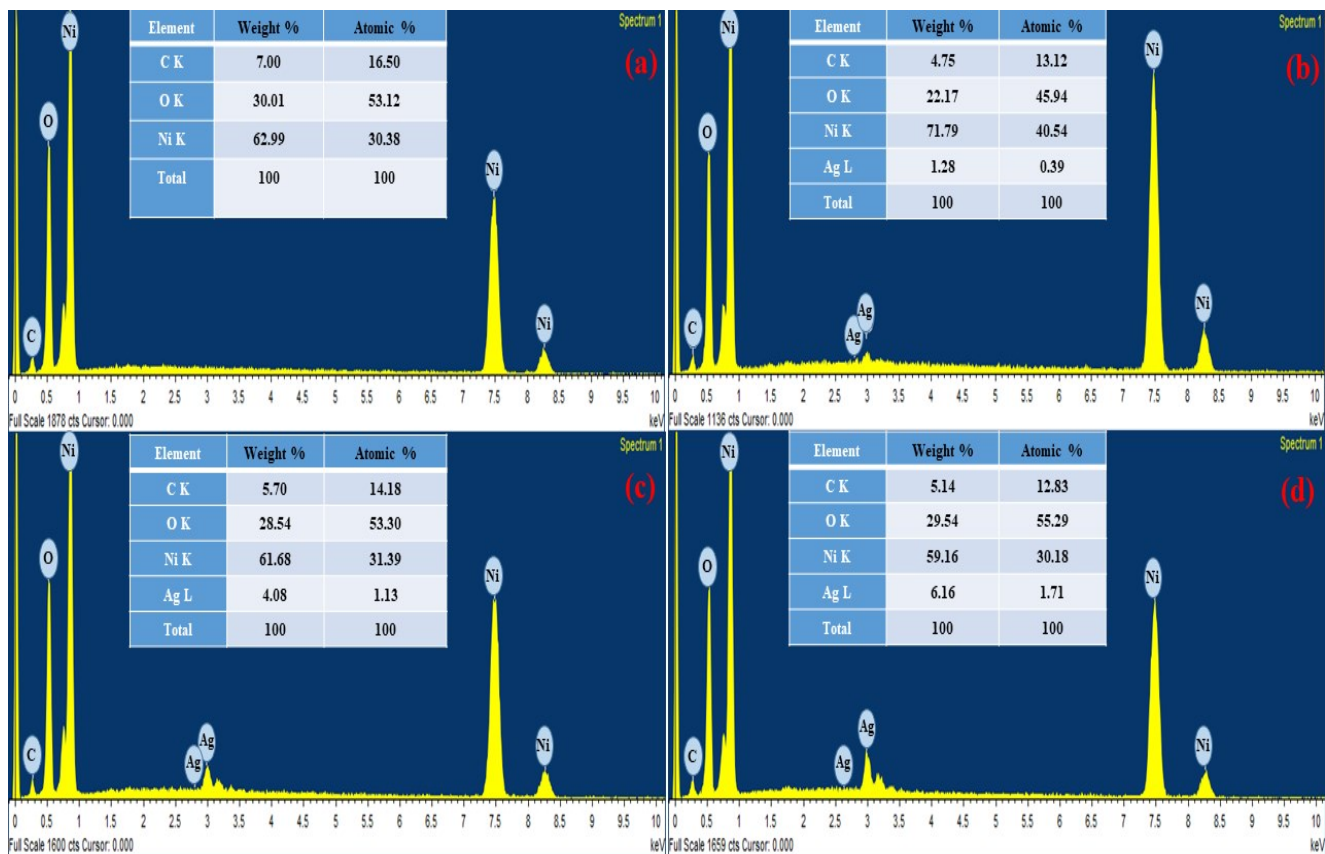

Fig S2. EDS spectra of NiO nanoparticles such as (a) PNiO, (b) 1AgNiO, (c) 3AgNiO, (d) 5AgNiO with different Ag doping concentration. The Atomic and weight percentage of Ni, O and Ag of each samples are shown in the inset table.

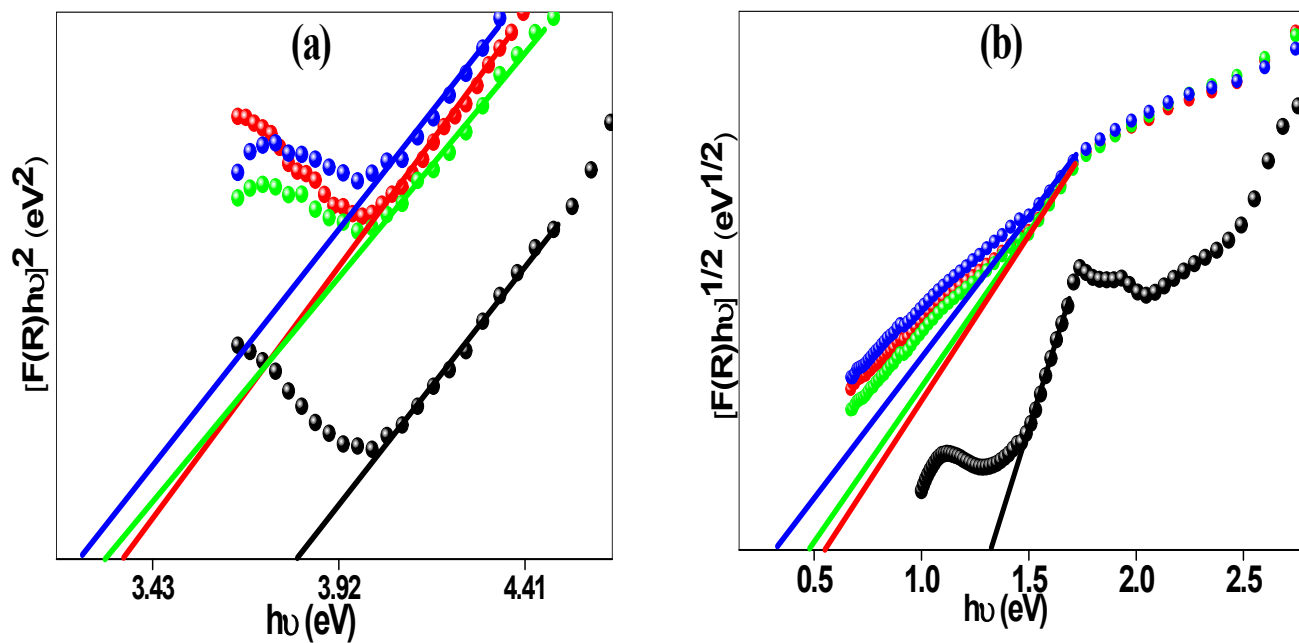

Fig S3. The Kubelka-Munks plot to determine the (a) direct and (b) indirect band gap of pure and Ag doped NiO nanoparticles.. The band gaps of the material were reduced due to the charge transfer from Ag to NiO.

| Sample code | TO                         |                          | SO                                |                                    |                                                      |                          | LO                         |                          |
|-------------|----------------------------|--------------------------|-----------------------------------|------------------------------------|------------------------------------------------------|--------------------------|----------------------------|--------------------------|
|             | Centre<br>cm <sup>-1</sup> | fwhm<br>cm <sup>-1</sup> | $\omega_{SO}$<br>cm <sup>-1</sup> | $\omega'_{SO}$<br>cm <sup>-1</sup> | Difference<br>( $\omega_{SO}$ ) - ( $\omega'_{SO}$ ) | fwhm<br>cm <sup>-1</sup> | Centre<br>cm <sup>-1</sup> | fwhm<br>cm <sup>-1</sup> |
|             |                            |                          |                                   |                                    |                                                      |                          |                            |                          |

|               |        |        |        |        | <b>cm<sup>-1</sup></b> |       |         |        |
|---------------|--------|--------|--------|--------|------------------------|-------|---------|--------|
| <b>PNiO</b>   | 395.90 | 136.99 | 458.97 | 531.92 | 72.95                  | 39.41 | 527.87  | 100.06 |
| <b>1AgNiO</b> | 384.03 | 114.29 | 461.34 | 515.97 | 54.63                  | 75.36 | 527.08  | 94.99  |
| <b>3AgNiO</b> | 371.22 | 108.95 | 458.76 | 498.76 | 40                     | 84.64 | 521.098 | 89.74  |
| <b>5AgNiO</b> | 350.02 | 41.39  | 458.72 | 470.27 | 11.55                  | 74.84 | 520.25  | 84.33  |

Table S1. FWHM and peak centres of first order phonon modes (TO, SO, and SO) in Raman spectra of prepared samples.

| <b>Sample code</b> | <b>H<sub>SEB</sub><br/>(Oe)</b> | <b>M<sub>VS</sub><br/>(emu/g)</b> |
|--------------------|---------------------------------|-----------------------------------|
| <b>PNiO</b>        | -30.46                          | -0.012                            |
| <b>1AgNiO</b>      | -9.11                           | -0.0053                           |
| <b>3AgNiO</b>      | -10.71                          | -0.0138                           |
| <b>5AgNiO</b>      | -8.37                           | -0.0373                           |

Table S2. Variation of spontaneous exchange bias effect (H<sub>SEB</sub>) and vertical shift (M<sub>VS</sub>) with Ag doping concentration.
